# Supplementary material for: Horizontal Acquisition of a Multidrug-Resistance Module (R-type ASSuT) Is Responsible for the Monophasic Phenotype in a Widespread Clone of Salmonella Serovar 4,[5],12:i:-
Source: PubMed Central journal article supplement (PMC4861720; doi:10.3389/fmicb.2016.00680), 2016-05-10
Supplement: Presentation2.pdf [file Presentation2.pdf]

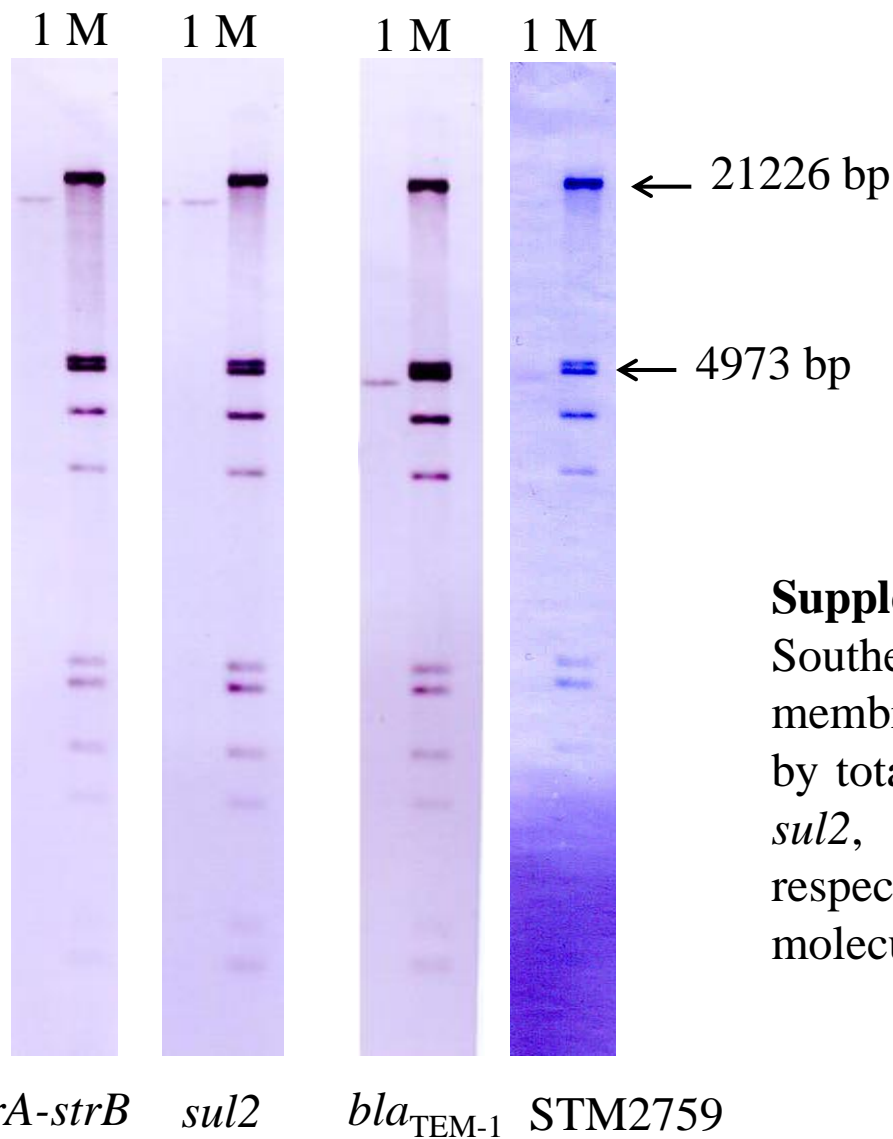

### Supplementary Figure S2.

Southern blot hybridization was performed on a membrane containing restriction fragments obtained by total DNA digestion with EcoRV, with *strA-strB*, *sul2*, *bla*<sub>TEM-1</sub>, and STM2759 gene probes, respectively. Lane 1: strain 07-2006. Lane M is the molecular weight marker lane (Marker MIII, Roche).
